# Supplementary material
Source: MDPI journal article supplement (https://www.mdpi.com/2673-6500/2/3/22)
Supplement: s1 [file s1]

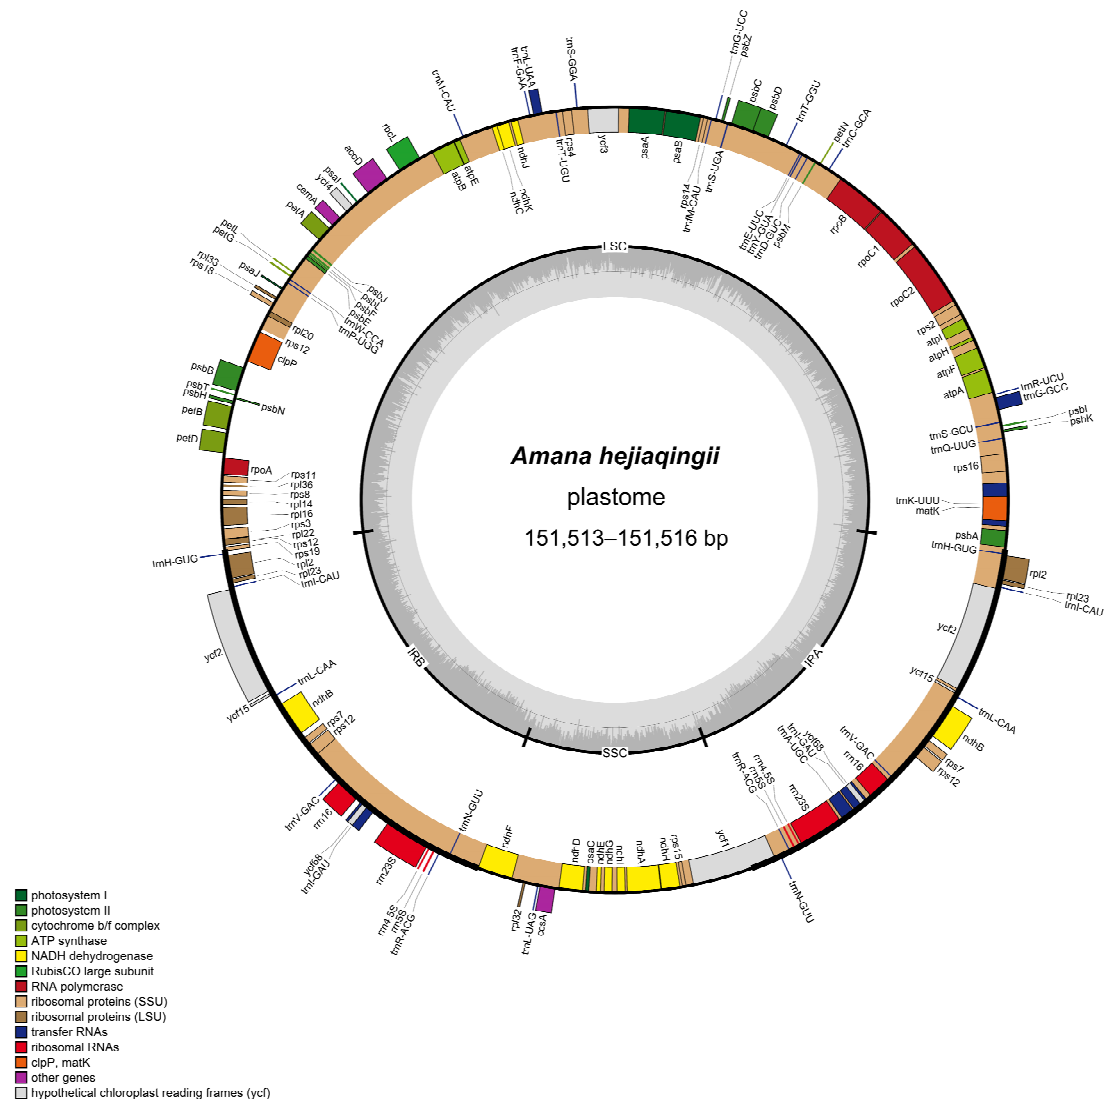

**Figure S1.** The complete plastome circle diagram of *Amana hejiaqingii*.

**Table S1.** Morphological data of *Amana anhuiensis*, *A. hejiaqingii* and *A. tianmuensis*

| Collect Number | Species                  | Position of the widest part of lower leaf (top:0; upper:1) | Number of white veins on lower leaf | Bract Length | Bract Width | Shape of bract (linear:0; lanceolate:1) | Colour of flowers (white:0, pink:1) | Outer tepal length | Outer tepal width | Inner tepal length | Inner tepal width | Colour of Anther (yellow:0, light-purple:1) | Location                                                             |
|----------------|--------------------------|------------------------------------------------------------|-------------------------------------|--------------|-------------|-----------------------------------------|-------------------------------------|--------------------|-------------------|--------------------|-------------------|---------------------------------------------|----------------------------------------------------------------------|
| WMZ1711-1      | <i>Amana hejiaqingii</i> | 1                                                          | 1                                   | 2.9          | 0.1         | 0                                       | 1                                   | 3.1                | 0.7               | 2.8                | 0.75              | 0                                           | Tayuan Temple, Tongbai County, Nanyang City, Henan Province          |
| WMZ1711-2      | <i>Amana hejiaqingii</i> | 1                                                          | 1                                   | 3.1          | 0.1         | 0                                       | 1                                   | 4.4                | 0.8               | 3.9                | 0.8               | 0                                           | Tayuan Temple, Tongbai County, Nanyang City, Henan Province          |
| WMZ1711-3      | <i>Amana hejiaqingii</i> | 1                                                          | 1                                   | 3.2          | 0.1         | 0                                       | 1                                   | 3.9                | 0.8               | 3.5                | 0.9               | 0                                           | Tayuan Temple, Tongbai County, Nanyang City, Henan Province          |
| WMZ1712-1      | <i>Amana hejiaqingii</i> | 1                                                          | 1                                   | 1.8          | 0.1         | 0                                       | 1                                   | 3.3                | 0.8               | 3.3                | 0.9               | 0                                           | Huang-jia-lao-zhuang, Tongbai County, Nanyang City, Henan Province   |
| WMZ1712-2      | <i>Amana hejiaqingii</i> | 0                                                          | 1                                   | 2.3          | 0.1         | 0                                       | 1                                   | 3.9                | 0.8               | 3.6                | 1                 | 0                                           | Huang-jia-lao-zhuang, Tongbai County, Nanyang City, Henan Province   |
| WMZ1712-3      | <i>Amana hejiaqingii</i> | 1                                                          | 1                                   | 2.2          | 0.2         | 0                                       | 1                                   | 3                  | 1                 | 2.8                | 1                 | 0                                           | Huang-jia-lao-zhuang, Tongbai County, Nanyang City, Henan Province   |
| WMZ1712-4      | <i>Amana hejiaqingii</i> | 0                                                          | 1                                   | 1.6          | 0.1         | 0                                       | 1                                   | 3                  | 0.7               | 2.9                | 0.8               | 0                                           | Huang-jia-lao-zhuang, Tongbai County, Nanyang City, Henan Province   |
| WMZ1714-1      | <i>Amana hejiaqingii</i> | 1                                                          | 1                                   | 1.9          | 0.1         | 0                                       | 1                                   | 4.2                | 1.1               | 3.8                | 0.9               | 0                                           | Hei-long-tan Waterfall, Shihe District, Xinyang City, Henan Province |

|           |                          |   |   |     |     |   |   |     |     |     |     |   |                                                                      |
|-----------|--------------------------|---|---|-----|-----|---|---|-----|-----|-----|-----|---|----------------------------------------------------------------------|
| WMZ1714-2 | <i>Amana hejiaqingii</i> | 0 | 1 | 2.2 | 0.1 | 0 | 1 | 3.5 | 0.7 | 3.3 | 0.8 | 0 | Hei-long-tan Waterfall, Shihe District, Xinyang City, Henan Province |
| WMZ1716-1 | <i>Amana hejiaqingii</i> | 1 | 1 | 1.8 | 0.1 | 0 | 1 | 3.6 | 0.6 | 3.4 | 0.7 | 0 | San-tan Scenic Area, Suizhou City, Hubei Province                    |
| WMZ1716-2 | <i>Amana hejiaqingii</i> | 0 | 1 | 2.6 | 0.1 | 0 | 1 | 4.2 | 0.8 | 3.9 | 0.9 | 0 | San-tan Scenic Area, Suizhou City, Hubei Province                    |
| WMZ1716-3 | <i>Amana hejiaqingii</i> | 1 | 1 | 2.1 | 0.1 | 0 | 1 | 3.7 | 0.7 | 3.6 | 0.8 | 0 | San-tan Scenic Area, Suizhou City, Hubei Province                    |
| WMZ1716-4 | <i>Amana hejiaqingii</i> | 0 | 1 | 0.9 | 0.1 | 0 | 1 | 3.1 | 0.6 | 3.1 | 0.6 | 0 | San-tan Scenic Area, Suizhou City, Hubei Province                    |
| WMZ1716-5 | <i>Amana hejiaqingii</i> | 1 | 1 | 1.5 | 0.1 | 0 | 1 | 3.2 | 0.7 | 3   | 0.8 | 0 | San-tan Scenic Area, Suizhou City, Hubei Province                    |
| WMZ1718-1 | <i>Amana hejiaqingii</i> | 1 | 1 | 2.3 | 0.2 | 0 | 1 | 4   | 0.8 | 3.8 | 1   | 0 | Hei-long-tan Scenic Area, Suizhou City, Hubei Province               |
| WMZ1718-2 | <i>Amana hejiaqingii</i> | 0 | 1 | 2   | 0.1 | 0 | 1 | 3.2 | 0.8 | 3.1 | 0.8 | 0 | Hei-long-tan Scenic Area, Suizhou City, Hubei Province               |
| WMZ1718-3 | <i>Amana hejiaqingii</i> | 1 | 1 | 2   | 0.2 | 0 | 1 | 4   | 1   | 3.9 | 1   | 0 | Hei-long-tan Scenic Area, Suizhou City, Hubei Province               |
| WMZ1718-4 | <i>Amana hejiaqingii</i> | 1 | 1 | 2   | 0.2 | 0 | 1 | 3.9 | 0.7 | 3.5 | 0.7 | 0 | Hei-long-tan Scenic Area, Suizhou City, Hubei Province               |
| WMZ1718-5 | <i>Amana hejiaqingii</i> | 1 | 1 | 1.8 | 0.1 | 0 | 1 | 3.2 | 0.6 | 3.1 | 0.6 | 0 | Hei-long-tan Scenic Area, Suizhou City, Hubei Province               |
| WMZ1722-1 | <i>Amana hejiaqingii</i> | 1 | 1 | 3.3 | 0.1 | 0 | 1 | 3   | 0.7 | 3   | 0.8 | 0 | Li-luo-cheng, Shangcheng County, Xinyang City, Henan Province        |
| WMZ1722-2 | <i>Amana hejiaqingii</i> | 0 | 1 | 3.1 | 0.1 | 0 | 1 | 3.1 | 0.6 | 3   | 0.7 | 0 | Li-luo-cheng, Shangcheng County, Xinyang City, Henan Province        |

|            |                          |   |   |      |      |   |   |      |      |      |      |   |                                                                                   |
|------------|--------------------------|---|---|------|------|---|---|------|------|------|------|---|-----------------------------------------------------------------------------------|
| WMZ1722-3  | <i>Amana hejiaqingii</i> | 1 | 1 | 3    | 0.1  | 0 | 1 | 2.8  | 0.7  | 2.7  | 0.8  | 0 | Li-luo-cheng, Shangcheng County, Xinyang City, Henan Province                     |
| WMZ1480-1  | <i>Amana anhuiensis</i>  | 0 | 3 | 3.8  | 0.4  | 1 | 1 | 3.2  | 0.7  | 2.8  | 0.7  | 1 | Mt. Tianzhu, Qianshan City, Anqing City, Anhui Province                           |
| WMZ1480-2  | <i>Amana anhuiensis</i>  | 0 | 5 | 3    | 0.5  | 1 | 1 | 3.3  | 0.8  | 3.4  | 0.9  | 1 | Mt. Tianzhu, Qianshan City, Anqing City, Anhui Province                           |
| WMZ1499    | <i>Amana anhuiensis</i>  | 0 | 3 | 2.9  | 0.4  | 1 | 1 | 3.2  | 0.7  | 2.7  | 0.8  | 1 | Zhenru Temple, Mt. Yunju, Yongxiu County, Jiujiang City, Jiangxi Province         |
| CMQ16215-1 | <i>Amana anhuiensis</i>  | 0 | 3 | 4    | 0.6  | 1 | 1 | 4.3  | 0.9  | 4.25 | 1.15 | 1 | Mt. Tianzhu, Qianshan City, Anqing City, Anhui Province                           |
| CMQ16215-2 | <i>Amana anhuiensis</i>  | 0 | 3 | 3.1  | 0.53 | 1 | 1 | 3.15 | 0.75 | 2.95 | 0.8  | 1 | Mt. Tianzhu, Qianshan City, Anqing City, Anhui Province                           |
| CMQ16215-3 | <i>Amana anhuiensis</i>  | 0 | 3 | 3.1  | 0.6  | 1 | 1 | 2.95 | 0.73 | 2.8  | 0.8  | 1 | Mt. Tianzhu, Qianshan City, Anqing City, Anhui Province                           |
| CMQ16215-4 | <i>Amana anhuiensis</i>  | 0 | 3 | 3.75 | 0.6  | 1 | 1 | 3.9  | 0.9  | 3.75 | 0.95 | 1 | Mt. Tianzhu, Qianshan City, Anqing City, Anhui Province                           |
| WMZ1465    | <i>Amana tianmuensis</i> | 1 | 0 | 2.7  | 0.1  | 0 | 0 | 2.1  | 0.6  | 1.8  | 0.6  | 0 | MT.Tianmu, Lin'an District, Hangzhou City, Zhejiang Province                      |
| WMZ1470-1  | <i>Amana tianmuensis</i> | 0 | 1 | 1    | 0.1  | 0 | 0 | 2.1  | 0.4  | 2.2  | 0.6  | 0 | Yuxiang Village, Xinming Town, Huangshan District, Huangshan City, Anhui Province |
| WMZ1470-2  | <i>Amana tianmuensis</i> | 0 | 1 | 0.6  | 0.1  | 0 | 0 | 2    | 0.4  | 1.8  | 0.5  | 0 | Yuxiang Village, Xinming Town, Huangshan District, Huangshan City, Anhui Province |
| WMZ1472    | <i>Amana tianmuensis</i> | 1 | 0 | 2    | 0.1  | 0 | 0 | 2.5  | 0.6  | 2.9  | 0.7  | 0 | Yuan-lin-chang, Gencheng Town, Huangshan District, Huangshan City, Anhui Province |
| WMZ1473    | <i>Amana</i>             | 1 | 1 | 2.4  | 0.1  | 0 | 0 | 2.7  | 0.6  | 2.6  | 0.7  | 0 | Mt. Jiuhua, Qingyang County, Chizhou City,                                        |

| <i>tianmuensis</i> |                          |   |   |     |      |   |   |      |     |      |      |   | Anhui Province                                                                      |
|--------------------|--------------------------|---|---|-----|------|---|---|------|-----|------|------|---|-------------------------------------------------------------------------------------|
| WMZ1502-1          | <i>Amana tianmuensis</i> | 1 | 0 | 2.3 | 0.05 | 0 | 0 | 2.4  | 0.4 | 2.5  | 0.4  | 0 | Qing-liang-feng Botanical Garden, Lin'an District, Hangzhou City, Zhejiang Province |
| WMZ1502-2          | <i>Amana tianmuensis</i> | 0 | 1 | 2.2 | 0.05 | 0 | 0 | 2.5  | 0.4 | 2.2  | 0.5  | 0 | Qing-liang-feng Botanical Garden, Lin'an District, Hangzhou City, Zhejiang Province |
| WMZ1502-3          | <i>Amana tianmuensis</i> | 1 | 0 | 2.2 | 0.05 | 0 | 0 | 2.5  | 0.5 | 2.2  | 0.5  | 0 | Qing-liang-feng Botanical Garden, Lin'an District, Hangzhou City, Zhejiang Province |
| WMZ1504-1          | <i>Amana tianmuensis</i> | 1 | 0 | 2.6 | 0.1  | 0 | 0 | 2.5  | 0.5 | 2.3  | 0.6  | 0 | MT.Tianmu, Lin'an District, Hangzhou City, Zhejiang Province                        |
| WMZ1504-2          | <i>Amana tianmuensis</i> | 1 | 1 | 3.1 | 0.3  | 0 | 0 | 2.5  | 0.6 | 2.3  | 0.5  | 0 | MT.Tianmu, Lin'an District, Hangzhou City, Zhejiang Province                        |
| WMZ1504-3          | <i>Amana tianmuensis</i> | 0 | 1 | 2.5 | 0.1  | 0 | 0 | 2.1  | 0.5 | 1.8  | 0.5  | 0 | MT.Tianmu, Lin'an District, Hangzhou City, Zhejiang Province                        |
| WMZ1505-1          | <i>Amana tianmuensis</i> | 1 | 1 | 2.1 | 0.1  | 0 | 0 | 3.1  | 0.6 | 2.9  | 0.7  | 0 | Zhe-xi-tian-chi, Lin'an District, Hangzhou City, Zhejiang Province                  |
| WMZ1505-2          | <i>Amana tianmuensis</i> | 1 | 0 | 2.4 | 0.1  | 0 | 0 | 2.5  | 0.4 | 2.4  | 0.5  | 0 | Zhe-xi-tian-chi, Lin'an District, Hangzhou City, Zhejiang Province                  |
| WMZ1505-3          | <i>Amana tianmuensis</i> | 1 | 0 | 2.9 | 0.1  | 0 | 0 | 2.4  | 0.5 | 2.3  | 0.7  | 0 | Zhe-xi-tian-chi, Lin'an District, Hangzhou City, Zhejiang Province                  |
| WMZ1505-4          | <i>Amana tianmuensis</i> | 1 | 0 | 2.9 | 0.1  | 0 | 0 | 2.9  | 0.5 | 2.7  | 0.6  | 0 | Zhe-xi-tian-chi, Lin'an District, Hangzhou City, Zhejiang Province                  |
| WMZ1505-5          | <i>Amana tianmuensis</i> | 1 | 1 | 2.2 | 0.1  | 0 | 0 | 2.7  | 0.5 | 2.6  | 0.6  | 0 | Zhe-xi-tian-chi, Lin'an District, Hangzhou City, Zhejiang Province                  |
| CMQ16198-1         | <i>Amana tianmuensis</i> | 1 | 0 | 2.8 | 0.26 | 0 | 0 | 1.95 | 0.6 | 1.8  | 0.55 | 0 | Lao-dian, Mt.Tianmu, Lin'an District, Hangzhou City, Zhejiang Province              |
| CMQ16198-          | <i>Amana</i>             | 1 | 0 | 2.8 | 0.2  | 0 | 0 | 2.2  | 0.6 | 2.15 | 0.55 | 0 | Lao-dian, Mt.Tianmu, Lin'an District,                                               |

|           |                    |   |   |     |      |   |   |      |      |      |      |   |                                       |
|-----------|--------------------|---|---|-----|------|---|---|------|------|------|------|---|---------------------------------------|
| 2         | <i>tianmuensis</i> |   |   |     |      |   |   |      |      |      |      |   | Hangzhou City, Zhejiang Province      |
| CMQ16198- | <i>Amana</i>       | 1 | 0 | 3   | 0.25 | 0 | 0 | 2.2  | 0.6  | 1.9  | 0.5  | 0 | Lao-dian, Mt.Tianmu, Lin'an District, |
| 3         | <i>tianmuensis</i> |   |   |     |      |   |   |      |      |      |      |   | Hangzhou City, Zhejiang Province      |
| CMQ16198- | <i>Amana</i>       | 1 | 0 | 3.4 | 0.3  | 0 | 0 | 2.5  | 0.6  | 2.25 | 0.65 | 0 | Lao-dian, Mt.Tianmu, Lin'an District, |
| 4         | <i>tianmuensis</i> |   |   |     |      |   |   |      |      |      |      |   | Hangzhou City, Zhejiang Province      |
| CMQ16198- | <i>Amana</i>       | 1 | 0 | 3.3 | 0.23 | 0 | 0 | 2.9  | 0.55 | 2.6  | 0.7  | 0 | Lao-dian, Mt.Tianmu, Lin'an District, |
| 5         | <i>tianmuensis</i> |   |   |     |      |   |   |      |      |      |      |   | Hangzhou City, Zhejiang Province      |
| CMQ16198- | <i>Amana</i>       | 1 | 0 | 2.2 | 0.18 | 0 | 0 | 1.85 | 0.4  | 1.9  | 0.4  | 0 | Lao-dian, Mt.Tianmu, Lin'an District, |
| 6         | <i>tianmuensis</i> |   |   |     |      |   |   |      |      |      |      |   | Hangzhou City, Zhejiang Province      |
